# Supplementary material for: Facile Synthesis of Yb3+- and Er3+-Codoped LiGdF4 Colloidal Nanocrystals with High-Quality Upconversion Luminescence
Source: Hindawi journal article supplement (doi:10.1155/2019/3928526), 2019-05-16
Supplement: f1 [file 3928526.f1.doc]

# Journal of Nanomaterials

Facile synthesis of Yb3+ and Er3+ co-doped LiGdF4 colloidal nanocrystals with high-quality upconversion luminescence

**Lu Zi,1 Dan Zhang,1 and Gejihu De1,2,3,***

1 College of Chemistry and Environment Science, Inner Mongolia Normal University, Hohhot 010022, China

2 Physics and Chemistry of Functional Materials, Inner Mongolia Key Laboratory, Hohhot 010022, China

3 State Key Laboratory on Integrated Optoelectronics, Jilin University, Changchun 130012, China

Correspondence should be addressed to Gejihu De; [degjh@imnu.edu.cn](mailto:degjh@imnu.edu.cn)

**Sample characterization**


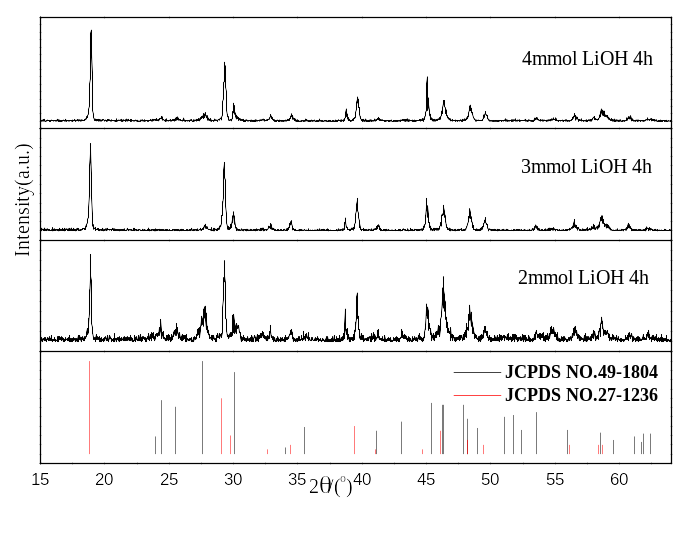


**Figure S1:** XRD patterns of LiGdF4:Yb3+/Er3+ nanocrystals, which are synthesized at Li+/Gd3+=2, 3, 4, t=4 h.


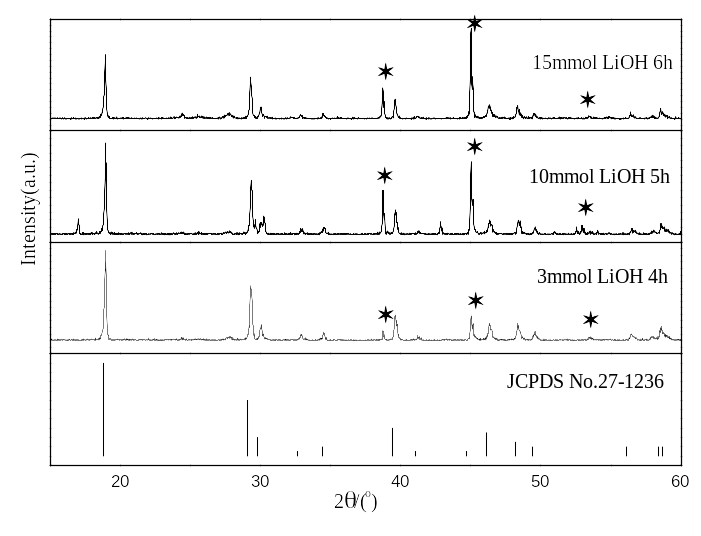


**Figure S2:** XRD patterns of LiGdF4:Yb3+/Er3+ nanocrystals (asterisk denotes as LiF). The standard data of LiGdF4 (JCPDS No.27-1236) is used as reference.

**Table S1** Theparameters for controlling synthesis of tetragonal LiGdF4:Yb3+/Er3+nanocrystals.

| Li/RE | temperature (℃) | time (h) | XRD phase |
| --- | --- | --- | --- |
| 2 | 310 | 4 | Orthorhombic GdF3 and Tetragonal LiGdF4 |
| 3 | 280 | 4 | Orthorhombic GdF3 and Tetragonal LiGdF4 |
| 3 | 290 | 4 | Orthorhombic GdF3 and Tetragonal LiGdF4 |
| 3 | 300 | 4 | Orthorhombic GdF3and Tetragonal LiGdF4 |
| 3 | 310 | 1 | Orthorhombic GdF3 and Tetragonal LiGdF4 |
| 3 | 310 | 2 | Orthorhombic GdF3 and Tetragonal LiGdF4 |
| 3 | 310 | 3 | Tetragonal LiGdF4 and impure phase |
| 3 | 310 | 4 | Tetragonal LiGdF4 |
| 3 | 310 | 5 | Tetragonal LiGdF4 |
| 4 | 310 | 4 | Orthorhombic GdF3 and Tetragonal LiGdF4 |
| 10 | 310 | 1 | Orthorhombic GdF3 |
| 10 | 310 | 2 | Orthorhombic GdF3 and Tetragonal LiGdF4 |
| 10 | 310 | 3 | Orthorhombic GdF3 and Tetragonal LiGdF4 |
| 10 | 310 | 4 | Orthorhombic GdF3 and Tetragonal LiGdF4 |
| 10 | 310 | 5 | Tetragonal LiGdF4 andimpure phase |
| 15 | 310 | 1 | Orthorhombic GdF3 |
| 15 | 310 | 2 | Orthorhombic GdF3 and Tetragonal LiGdF4 |
| 15 | 310 | 3 | Orthorhombic GdF3 and Tetragonal LiGdF4 |
| 15 | 310 | 4 | Orthorhombic GdF3 and Tetragonal LiGdF4 |
| 15 | 310 | 5 | Orthorhombic GdF3and Tetragonal LiGdF4 |
| 15 | 310 | 6 | Orthorhombic GdF3 and Tetragonal LiGdF4 |

Table S1 shows that the optimum condition of the tetragonal LiGdF4:Yb3+/Er3+ nanocrystals are synthesized at Li+/Gd3+=3, t=4 h, T=310 ℃.

**Table S2** The red emission intensity, green emission intensity, and the reaction time of the samples.

| time (h) | red emission intensity | green emission intensity |
| --- | --- | --- |
| 1 | 20.69 | 191.7 |
| 2 | 88.43 | 755.4 |
| 3 | 90.43 | 763.7 |
| 4 | 273.3 | 1888 |
| 5 | 35.26 | 273.7 |

**Figure S3:** The red emission intensity, green emission intensity, and the reaction time for LiGdF4:Yb3+/Er3+ nanocrystals at Li+/Gd3+=3, T=310 ℃.

Figure S3 suggests the existence of dynamic causal relationship between emission intensity and the reaction time of LiGdF4:Yb3+/Er3+ nanocrystals, which are synthesized at Li+/Gd3+=3, T=310 ℃. We can easily find that the upconversion luminescence intensity of LiGdF4:Yb3+/Er3+ nanocrystals (Li+/Gd3+=3, t=4 h, T=310 ℃) is the biggest. Moreover, the final experimental result suggests that the optimum condition of the tetragonal LiGdF4:Yb3+/Er3+ nanocrystals are synthesized at Li+/Gd3+=3, t=4 h, T=310 ℃

(b)

(c)

**Figure S4:** UCL decays from (a) 2H11/2 (b) 4S3/2 and (c) 4F9/2 of Er3+ by monitoring the Er3+ emission at 523 nm, 543 nm and 672 nm under 980 nm excitation in LiGdF4 :Yb3+/Er3+ nanocrystals, which are synthesized at Li+/Gd3+=3, T=310 ℃, t=4 h.

(a)
